# Supplementary material
Source: PubMed Central journal article supplement (PMC4974343)

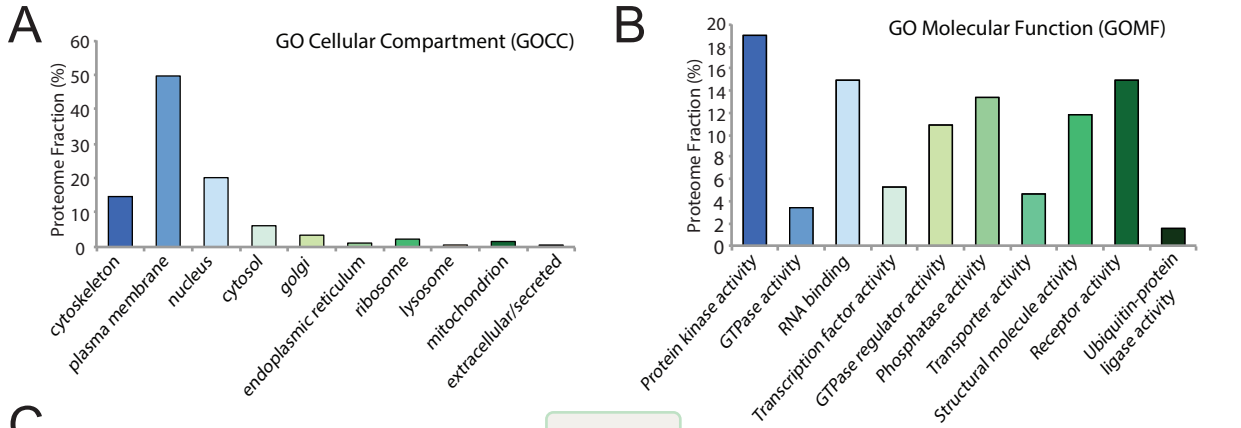

**C**

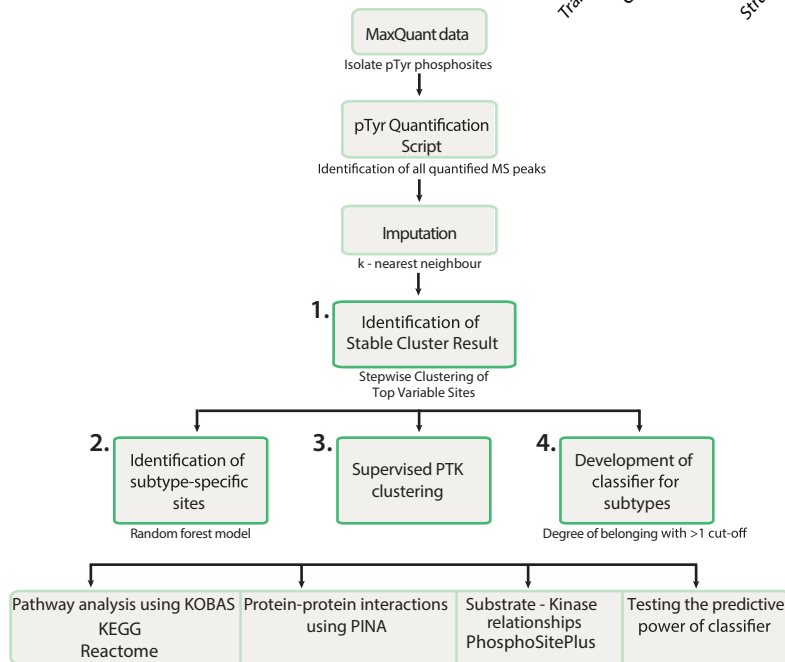

**D**

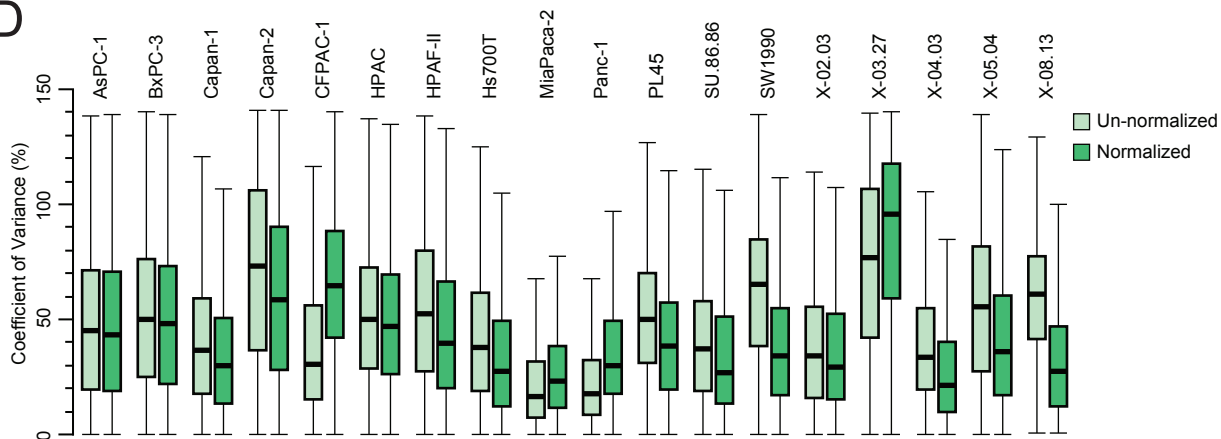

Supplement: 10.1074_M116.058313_mcp.M116.058313-1.pdf [file 10.1074_M116.058313_mcp.M116.058313-1.pdf]
